# Supplementary material for: Network Pharmacology of Ginseng (Part III): Antitumor Potential of a Fixed Combination of Red Ginseng and Red Sage as Determined by Transcriptomics
Source: MDPI journal article supplement (doi:10.3390/ph15111345), 2022-10-30

## Settings/Legend

Measurement: Expr Fold Change

-1,822.032

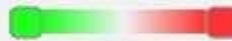

Sort Method: Expression

Edit Network

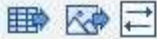

Genes in the Glyc...

HRG1

SAL

GPI  
PGAM2  
BPGM  
PFKL  
TPI1  
ALDOA  
PKM  
PGK1  
ENO1

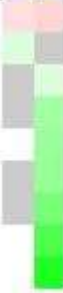

Supplement: s1 [file s1]
