# Supplementary material for: Network Pharmacology of Ginseng (Part III): Antitumor Potential of a Fixed Combination of Red Ginseng and Red Sage as Determined by Transcriptomics
Source: MDPI journal article supplement (doi:10.3390/ph15111345), 2022-10-30
Supplement: s1 [file s1]

Chart Overlapping

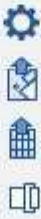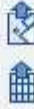

Horizontal Bar Chart

positive z-score negative z-score = 0 no activity pattern available

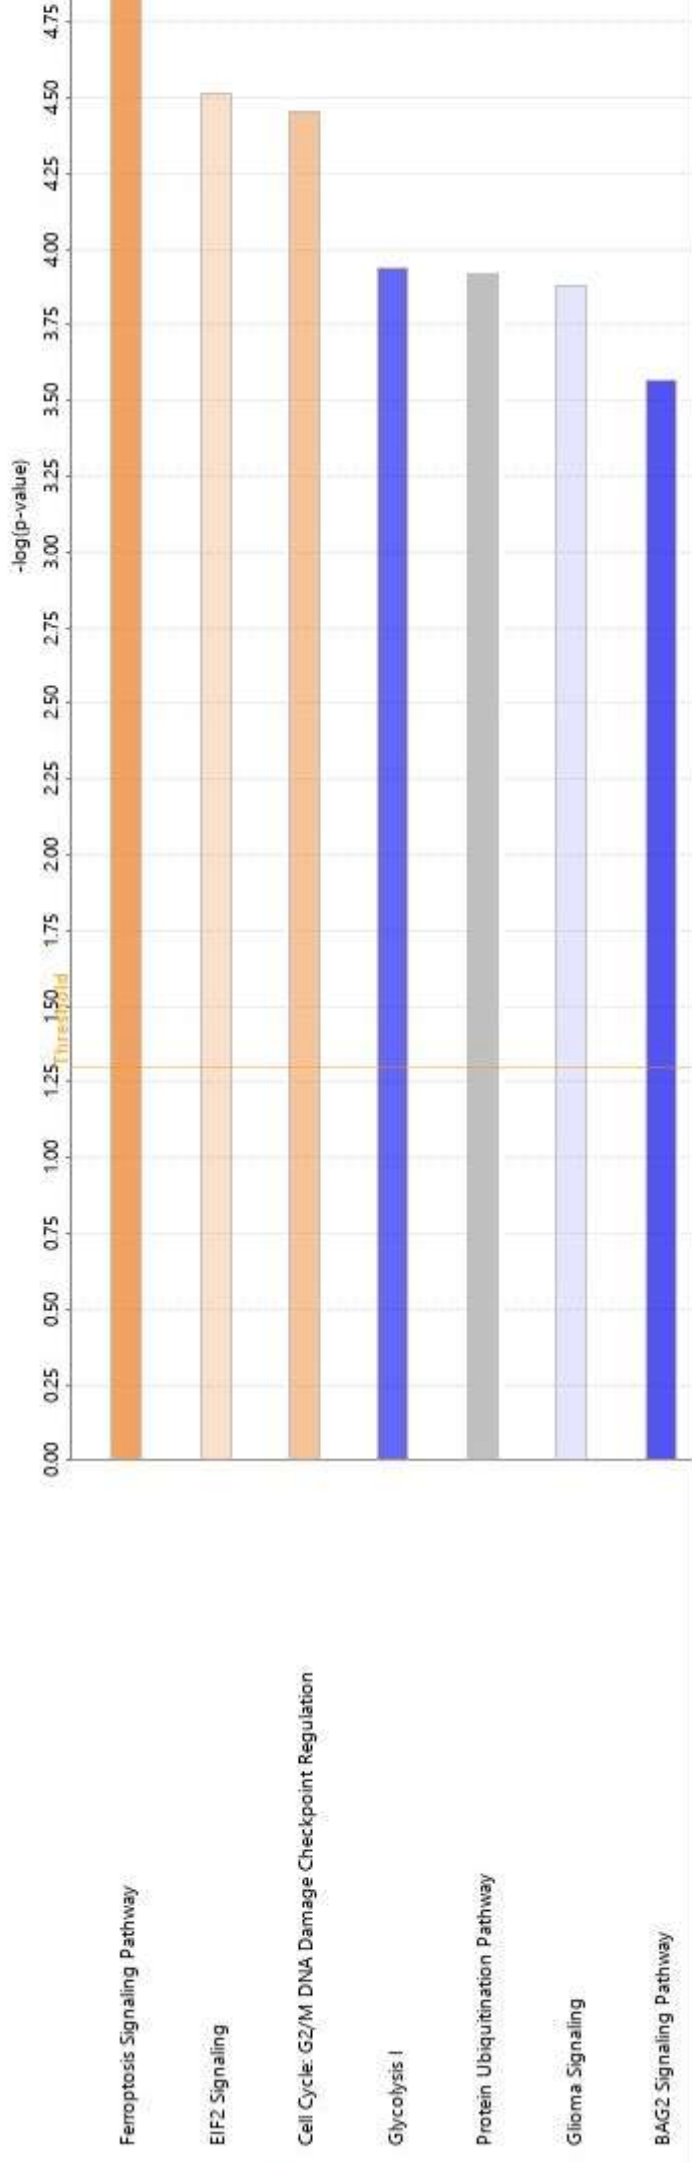

7 molecule(s) associated with Glycolysis I [Ratio: 7/21 (0.333)] [z-score: -1.89] [p-value: 1.15E-04]

Add To My Pathway Add To My List Create Dataset Customize Table Expand

| Symbol | Entrez Gene Name                  | Identifier          | Measurement      | Expected | Location            | Type(s)     | Biomarker Applica...     |
|--------|-----------------------------------|---------------------|------------------|----------|---------------------|-------------|--------------------------|
| ALDOA  | aldolase, fructose-bisphosphate A | Gene Symbol - hu... | Expr Fold Change |          |                     |             |                          |
| BPGM   | bisphosphoglycerate mutase        | ALDOA               | ↑ -855.146       | ↑ Up     | Cytoplasm           | enzyme      | unspecified applic...all |
| ENO1*  | enolase 1                         | BPGM                | ↓ -37.688        | ↑ Up     | Extracellular Space | phosphatase | diagnosis                |
| GPI*   | glucose-6-phosphate isomerase     | ENO1*               | ↓ -2561.827      | ↑ Up     | Cytoplasm           | enzyme      | unspecified applic...all |
| PGK1*  | phosphoglycerate kinase 1         | GPI*                | ↑ 371.745        | ↑ Up     | Extracellular Space | enzyme      | unspecified applic...all |
| PKM    | pyruvate kinase M1/2              | PGK1*               | ↓ -1425.541      | ↑ Up     | Cytoplasm           | kinase      | unspecified applic...all |
| TPST1* | triisophosphate isomerase 1       | PKM                 | ↓ -1094.053      | ↑ Up     | Cytoplasm           | kinase      | diagnosis, unspeci...    |
|        |                                   | TPST1*              | ↓ -810.284       | ↑ Up     | Cytoplasm           | enzyme      | unspecified applic...all |
