# Supplementary figures and images for: Network Pharmacology of Ginseng (Part III): Antitumor Potential of a Fixed Combination of Red Ginseng and Red Sage as Determined by Transcriptomics
Source: MDPI journal article supplement (doi:10.3390/ph15111345), 2022-10-30

positive z-score    z-score = 0    negative z-score    no activity pattern available

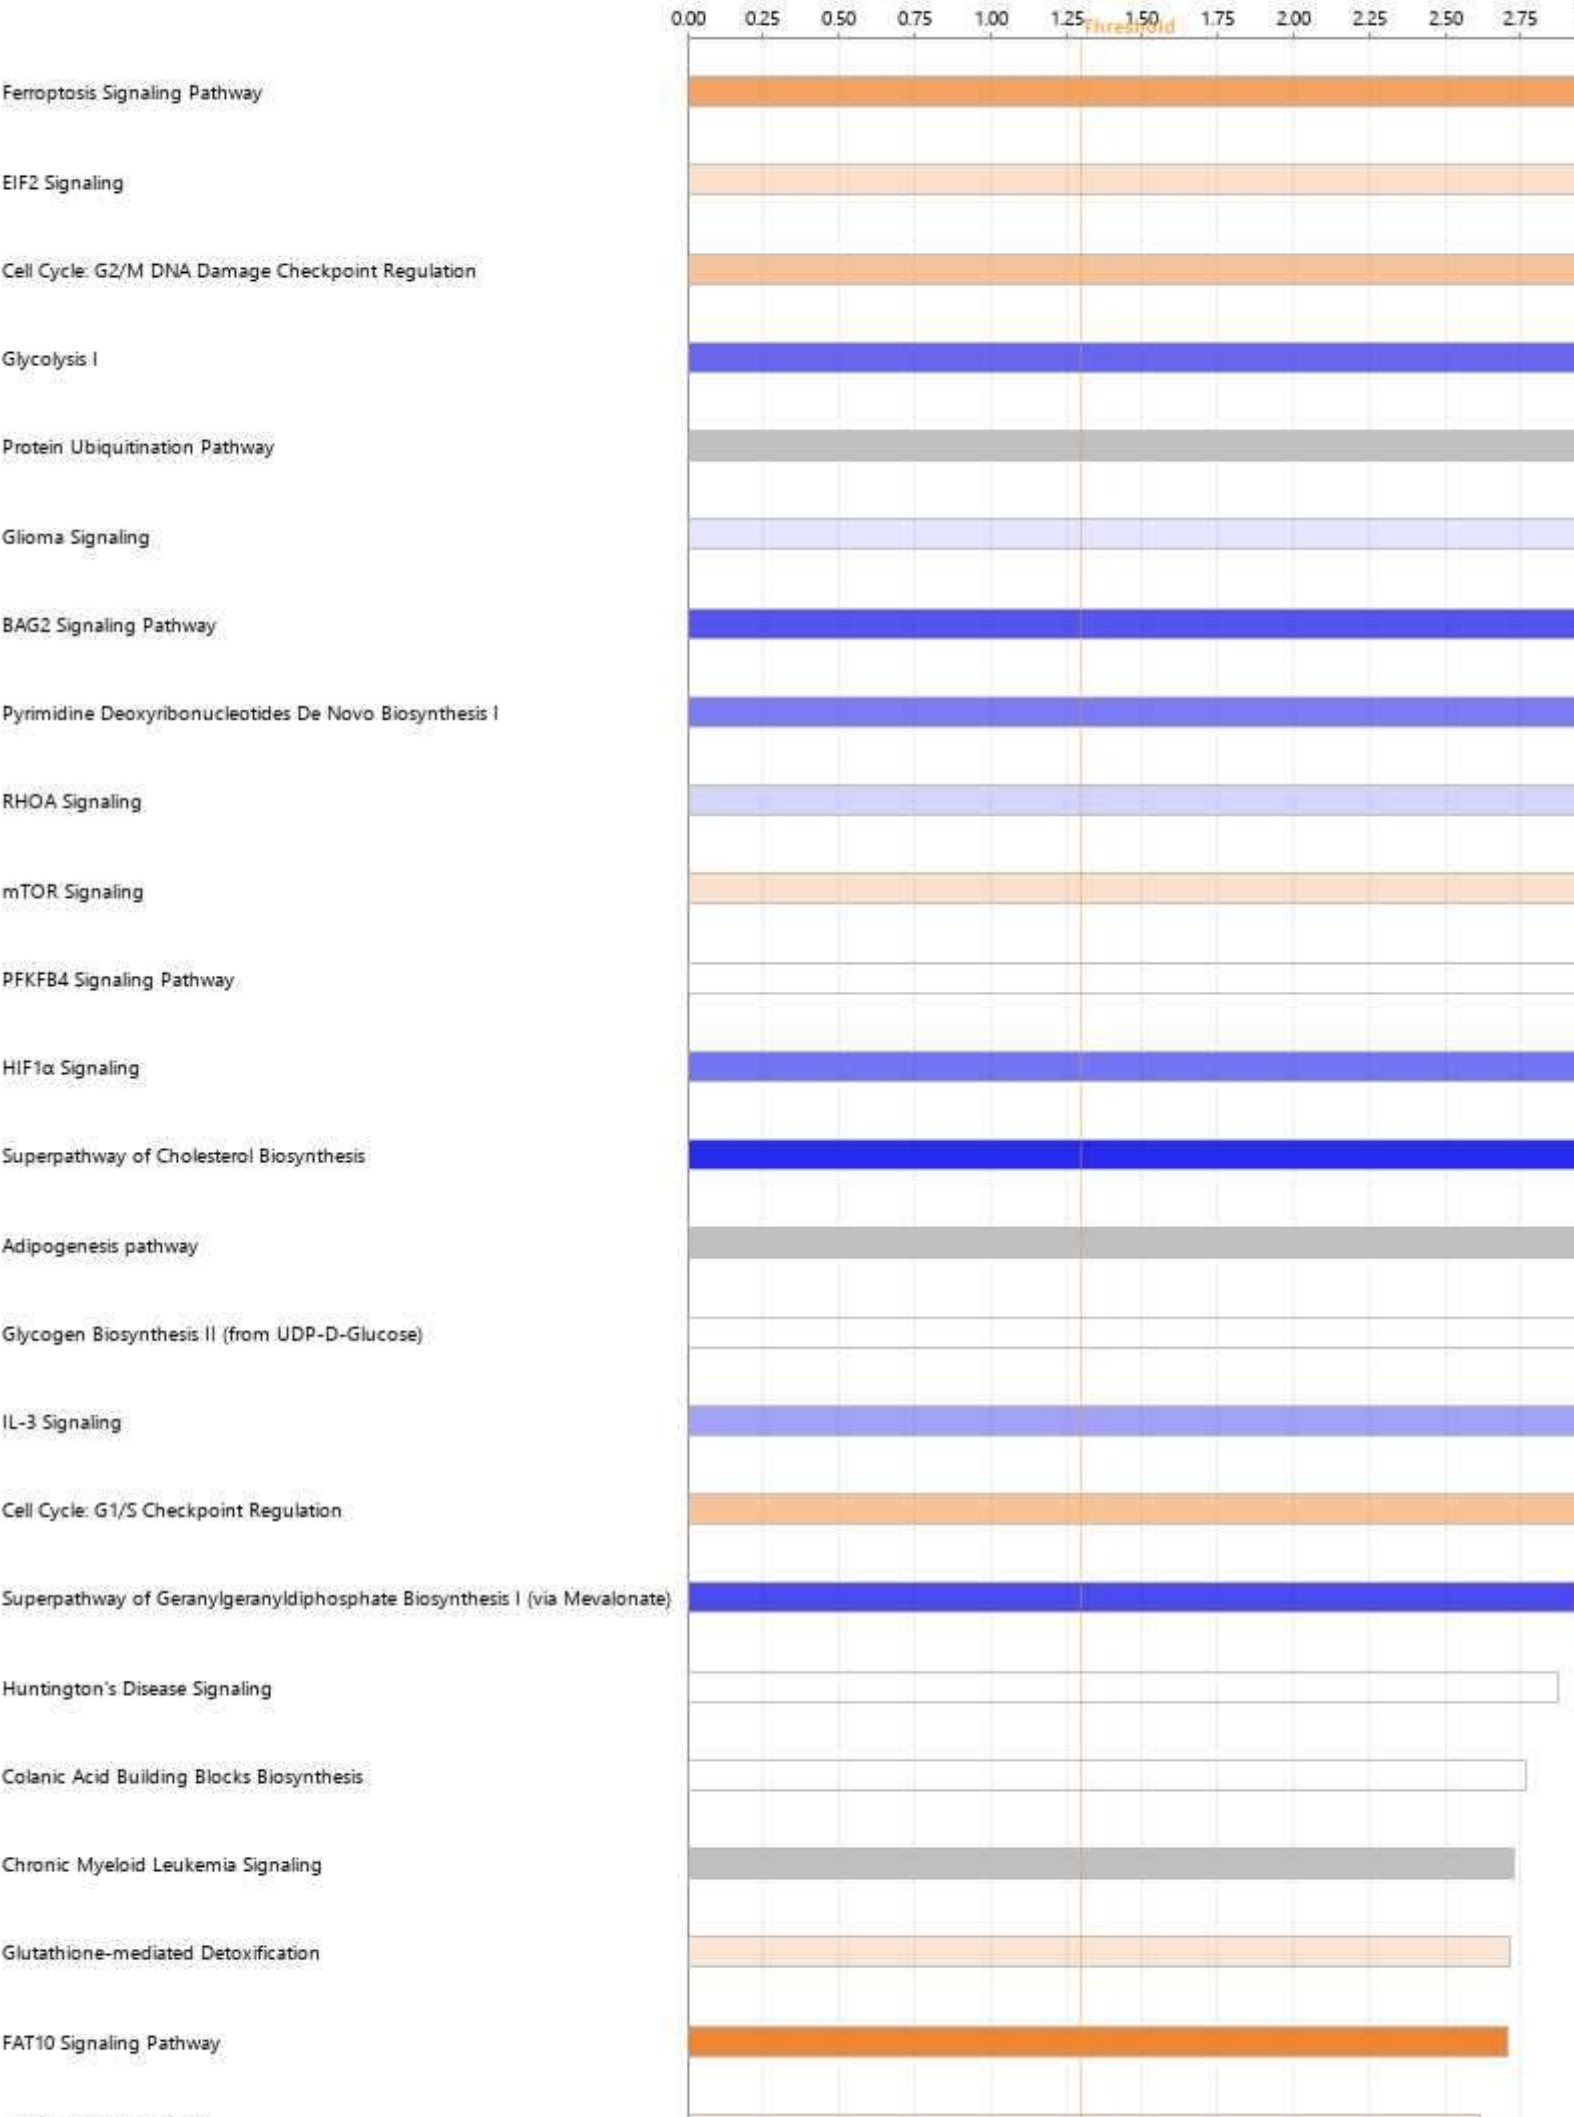

Supplement: s1 [file s1]
